# Supplementary material
Source: PubMed Central journal article supplement (PMC3154093)
Supplement: NIHMS315969-supplement-supplemental_data.pdf [file NIHMS315969-supplement-supplemental_data.pdf]

# Supporting Online Material

for

## **Proteoglycan-specific molecular switch for RPTP $\sigma$ clustering and neuronal extension**

Charlotte H. Coles,<sup>1,\*</sup> Yingjie Shen,<sup>2,\*</sup> Alan P. Tenney,<sup>2,3,‡</sup> Christian Siebold,<sup>1,‡</sup> Geoffrey C. Sutton,<sup>1</sup> Weixian Lu,<sup>1</sup> John T. Gallagher,<sup>4</sup> E. Yvonne Jones<sup>1,†</sup>, John G. Flanagan,<sup>2,†</sup> A. Radu Aricescu<sup>1,†</sup>

Materials and methods

Figs. S1 to S15

Tables S1 to S3

References

## **Materials and methods**

### **Construct design and cloning**

A series of type IIa RPTP constructs were cloned into the pHLsec vector (*S1*), introducing an N-terminal secretion signal sequence and a C-terminal hexahistadine tag. Human RPTP $\sigma$  short isoform (NCBI Ref. Seq. NM\_130853.2): Ig1-2 (amino acids 30-231), Ig1-3 (30-321), Ig1-FN3 (30-602), sEcto (30-839). Human RPTP LAR (NCBI Ref. Seq. NM\_002840.3): Ig1-2 (30-231), Ig1-FN3 (30-602). Human RPTP $\delta$  (NCBI Ref. Seq. BC106713.1): Ig1-2 (21-220), Ig1-FN3 (21-594). *Drosophila* RPTP LAR (NCBI Ref. Seq. NM\_078880.3): Ig1-2 (33-232), Ig1-FN3 (33-606). Chick RPTP $\sigma$  (NCBI Ref. Seq. NM\_205407.1) Ig1-2 29-226. A human RPTP $\sigma$  Ig1-3 R227Q+R228N mutant construct was designed to prevent proteolytic cleavage during Ig1-3 crystallisation trials. This construct was generated by two-step overlapping PCRs. The Glypican2-AP construct was generated by subcloning the coding sequence for amino acids 1-555 of mouse Glypican-2 (NCBI Ref. Seq. BC083180) into the APTag5 vector. Mouse RPTP $\sigma$  sEcto-Fc and Neurocan-AP fusion proteins were generated as described previously (*S2*).

### **Protein purification and crystallisation**

All Ig1-2 constructs were expressed in HEK-293T cells following transient transfection using polyethylenimine (*S1*). Human RPTP $\sigma$  Ig1-3 R227Q+R228N was expressed in HEK-293T cells, in the presence of kifunensine (Toronto Research Chemicals), a specific inhibitor of  $\alpha$ -mannosidase (*S3*, *S4*). Ig1-FN3 and sEcto constructs were expressed in either HEK-293T cells in the presence of kifunensine or in GnTI<sup>-</sup> HEK293S cells (*S5*). All proteins were purified from filtered cell culture media by immobilised nickel affinity chromatography (Chelating Sepharose Fast Flow, GE Healthcare) followed by heparin affinity chromatography (HiTrap Heparin HP column, GE Healthcare) and finally gel filtration

(Superdex resin, GE Healthcare) in 10 mM HEPES, 150 mM NaCl, pH 7.5. In addition, the human RPTP $\sigma$  Ig1-3 R227Q+R228N protein, which contains two N-linked glycosylation sites, was incubated for 3 hours at 37 °C with endoglycosidase F1 (*S4*, *S6*) to cleave the N-linked Man<sub>9</sub>GlcNAc<sub>2</sub> oligosaccharides to a single GlcNAc residue prior to the heparin affinity chromatography step of the purification. Expression of selenomethionine labelled protein was carried out as described previously (*S1*) and the protein was subsequently purified as described for native proteins.

Crystallisation trials, using 100 nl protein solution plus 100nl reservoir solution in sitting drop vapour diffusion format were set up in 96-well Greiner plates using a Cartesian Technologies robot (*S7*). Crystallisation plates were maintained at 20.5 °C in a TAP Homebase storage vault and imaged *via* a Veeco visualisation system (*S8*). Crystallisation conditions for all proteins are provided in Table S1.

### **Data collection and processing**

All crystals obtained were cryo-protected as stated (Table S1) and then flash frozen at 100 K. X-ray diffraction data was collected at the Diamond Light Source, Oxfordshire, UK or the European Synchrotron Radiation Facility, France as indicated. The diffraction images were indexed, integrated, scaled and merged using either the HKL2000 (*S9*) or the xia2 (*S10*) data processing suites. The chick RPTP $\sigma$  Ig1-2 structure was determined by SAD analysis, using images collected from a selenomethionine labelled protein crystal at the selenium peak wavelength ( $\lambda = 0.9783$  Å). Using SHELXD (*S11*) *via* the autoSHARP interface (*S12*), the positions of two selenium atoms were determined, before subsequent phase calculation, improvement and preliminary model building was performed. These preliminary models were used together with a high resolution (1.65 Å) native dataset in iterative rounds of automatic model building using RESOLVE (*S13*), ARP/wARP (*S14*) and manual building

using Coot (*S15*). The data obtained for all subsequent type IIa RPTP proteins were phased by molecular replacement using the chicken RPTP $\sigma$  Ig1-2 solution as a search model in Phaser (*S16*). The resulting electron density maps were of high quality and enabled manual model adjustment in Coot (*S15*) and refinement in Refmac (*S17*), Phenix (*S18*) and Buster (*S19*). For structural validation PROCHECK (*S20*) and MolProbity (*S21*) were used to assess the stereochemical properties of the models and refinement statistics are given in Table S2. The superimposition of atomic models to compare the domain architecture between different structures, was performed using SHP (*S22*), based on C $\alpha$  positions. Crystallographic figures were created using PyMOL (*S23*) and APBS was used to calculate the electrostatic potential of solvent accessible surfaces (*S24*).

### **Multi-angle light scattering (MALS)**

MALS experiments were carried out on a Wyatt MALS/AFFF System (Wyatt Technologies). All proteins were purified as described above, and samples were incubated alone or with an oligosaccharide ligand for an hour at room temperature prior to use in MALS analysis. For size defined heparin fragments (Iduron dp4-dp30; product codes HO04-HO30) a five-fold molar excess of oligosaccharide to protein was used, except for the series of experiments presented in Fig. S9, where a range of RPTP $\sigma$  constructs were tested with a separate batch of dp10 at a two-fold molar excess (Table S3, highlighted in blue). Equivalent amounts (equal mg/ml concentrations) of HS (Iduron, GAG-HS01) and CS (Sigma, C4384) were used for MALS experiments as had been for heparin dp10 (in giving a five-fold molar excess). “x5” indicates that a five-fold greater quantity of HS or CS was used. All Ig1-FN3 proteins were injected at approximately 10  $\mu$ M. Size exclusion chromatography was performed in 10 mM Tris, 50 mM NaCl, pH 7.5 on a Superdex75 or Superdex200 HR10/30 column (GE Healthcare), attached to an Agilent chromatography system. An Optilab rEX Refractive Index detector and a Dawn Helios II Multi-Angle Light Scattering (MALS)



detector recorded the refractive index and light scattering of the samples upon elution from the size exclusion column. The Wyatt software ASTRA was used to analyse all the data collected.

### **Native Mass Spectrometry**

10  $\mu\text{M}$  human RPTP $\sigma$  Ig1-2 (desalted previously into 100 mM ammonium acetate pH 7.5) and 50  $\mu\text{M}$  dp10 (ammonium salt) were incubated in a final volume of 500  $\mu\text{l}$  for an hour. Gel filtration in 100 mM ammonium acetate pH 7.5 was carried out with this complex sample and the Ig1-2 protein alone, and fractions taken from the peaks on the UV traces and diluted to a concentration of 8  $\mu\text{M}$  were used for analysis. Electrospray ionisation-mass spectrometry (ESI-MS) was carried out on a Waters Quadrupole Time-of-Flight (Q-ToF) Micro instrument with direct infusion of the protein samples. For native analysis, the protein-heparin complex spectrum was obtained using a cone voltage of 200 V.

### **Analytical Ultracentrifugation**

Sedimentation equilibrium and velocity experiments were carried out at 20 °C in an Optima XL-I analytical ultracentrifuge (Beckman Instruments) utilising a scanning absorbance of 280 nm and interference optics. Samples of human RPTP $\sigma$  Ig1-2 alone and in complex to heparin dp10, were taken directly from gel filtration in 20 mM Tris, 50 mM NaCl pH 7.5. Sedimentation velocity experiments were performed and analysed using the time derivative  $g(s^*)$  method (25). Samples were equilibrated at 20 °C in the rotor, before the velocity was sequentially increased through speeds of 12, 18, 25, 35 and 50 krpm, 50 scans being made at each speed. ProFit (QuantumSoft) was used to fit Gaussian curves to the  $g(s^*)$  plots obtained, and to describe the distribution of individual species.

### **Solid phase binding assays**

Analysis of binding between RPTP $\sigma$  sEcto-Fc and Glypican-2 or Neurocan alkaline phosphate (AP) fusion proteins was performed as described previously (S2, S26). All fusion proteins were produced in transiently transfected 293T cells. Briefly, the RPTP $\sigma$  Fc-fusion protein was immobilised on 96-well Reactibind Protein A-coated plates (Pierce) and incubated with soluble proteoglycan-AP proteins which had been normalised for equal AP activity. AP activity was determined by measuring substrate turnover on a microplate reader as described (S27, S28). For experiments involving treatment with chondroitinase ABC (Sigma) or heparitinase III (HPNIII, Sigma), chondroitinase-treated, heparitinase-treated or mock-treated proteoglycan-APs were incubated at 37 °C for 2 hours prior to addition to the RPTP $\sigma$ -Fc coated plates.

### **DRG neurite outgrowth assay and immunofluorescence**

DRGs of P8-12 *RPTP $\sigma$ <sup>+/+</sup>* or *RPTP $\sigma$ <sup>-/-</sup>* mice were cut off from all roots. Neurons were dissociated and subjected to neurite outgrowth assays and analysis as described previously (S2). For experiments in Fig. 1, recombinant mouse Neurocan (5800-NC, R&D Systems) was used at 5  $\mu$ g/ml and recombinant mouse Glypican-2 (2355-GP, R&D Systems) at 30  $\mu$ g/ml. In Fig. S1, 30  $\mu$ g/ml of Glypican-2 was pre-incubated with 1 unit/ml of Heparitinase III (HPNIII, H8891, Sigma) at 37 °C for 4 hrs where indicated, prior to use in outgrowth assays. For experiments in Fig. S15, recombinant mouse glypican-2 was used at 5  $\mu$ g/ml, and Chondroitin Sulfate Proteoglycan mixture (CSPG, CC117, Millipore) was at 125  $\mu$ g/ml. Proteoglycans were added to neuronal cultures 30 min after seeding and were replenished 24 hrs later. At 48 hrs after seeding, cells were fixed and immunostained with anti-GAP43 antibody (NB300-143, Novus). The whole of each well was scanned with a fluorescence microscope and the images were then analyzed for total neurite outgrowth using the Metamorph program.

For immunolocalization, dissociated DRG neurons were cultured without treatment then fixed and permeabilized, to allow co-staining with the cytoplasmic marker GAP43, at about 48 hrs after seeding. Where indicated, the fixed samples were then treated at 37 °C for 2 hrs with either 1 unit/ml of Chondroitinase ABC (C3667, Sigma) or a mixture of Heparinase I, II and III (H2519, H6512, H8891, Sigma), each at 1 unit/ml. Subsequently, samples were subjected to immunostaining using anti-chondroitin sulfate antibody (C8035, Sigma), anti-heparin/heparan sulfate antibody (OBT1698, AbD Serotec), anti-RPTP $\sigma$  antibody (AF3430, R&D Systems) and anti-GAP43 antibody (NB300-143, Novus).

### **Statistics**

Error bars show SEMs; *P* values were calculated by Student's t-test.

## Supporting Figures

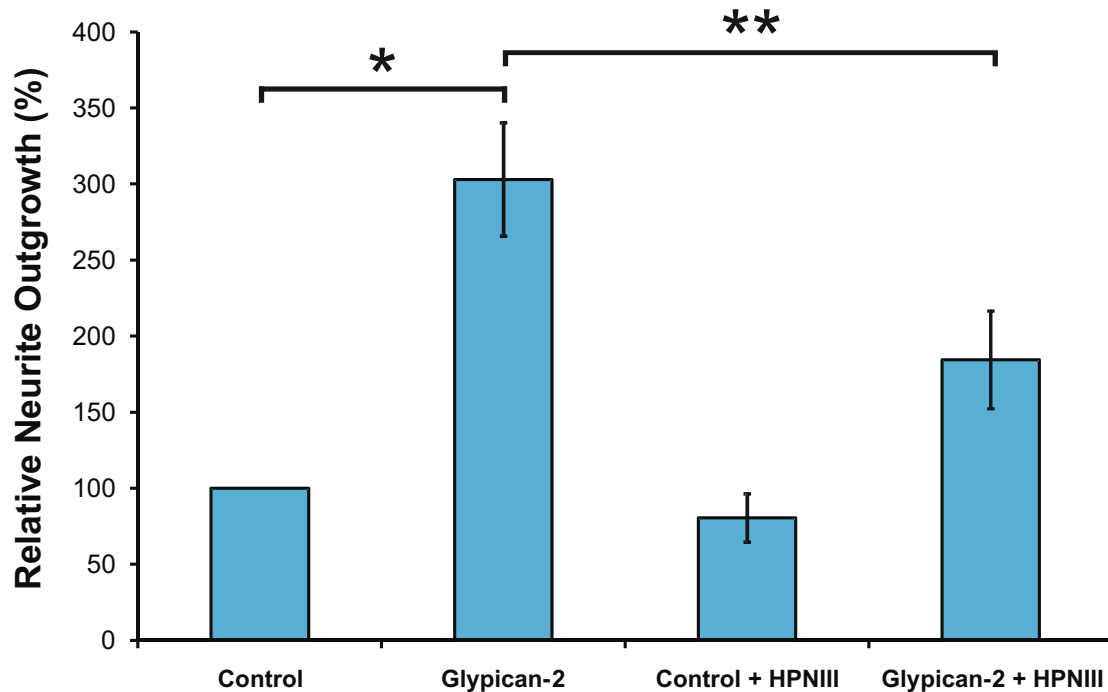

**Figure S1.** Glypican-2 induced neurite outgrowth is largely dependent upon the presence of its heparan sulphate moieties. Wild-type P8 mouse dorsal root ganglion (DRG) neurons were grown on substrates containing a poly-D-lysine/laminin mixture (control) or supplemented with glypican-2, either with or without heparitinase III (HPNIII) treatment. The outgrowth of DRG neurons, relative to the control (assigned 100 % outgrowth) was quantified. Treatment with HPNIII did not completely eliminate the growth promoting effect of the glypican-2 substrate, which may reflect either novel interactions involving the deglycosylated glypican core or incomplete enzymatic digestion of the heparan sulphate chains. Error bars show SEMs. \*\* $p < 0.005$  and \* $p < 0.05$ , Student's t-test. The necessity of the chondroitin sulphate groups of neurocan for CSPG-mediated inhibition of DRG outgrowth, has been reported previously (S2).



**Figure S2.** Sequence alignment of the two N-terminal Ig domains of the type IIa RPTP family members across species. Sequences correspond to the RPTP isoforms lacking the MeA and MeB exons, based on amino acid sequences taken from the following sources: RPTP $\sigma$  human (NM\_130854.2), mouse (BC052462.1), chicken (NM\_205407.1), xenopus (NM\_001141992.1) and zebrafish (XP\_002666198.1); RPTP $\delta$  human (BC106713.1), mouse (EDL31049.1), chick (NP\_990738.1), xenopus (NM\_001090381.1) and zebrafish (NP\_001159520.1); RPTP LAR human (NM\_002840.3), mouse (NM\_011213.2), chicken (XP\_001233494.1), xenopus (NP\_001081987) and zebrafish (NP\_001077045.1); *Drosophila* LAR (NM\_078880.3), leech HmLAR1 (AF017084.1) and HmLAR2 (AF017083.1), *C. elegans* PTP-3A (AF316539.1) and *Nematostella* RPTP (XP\_001639024.1). Numbers above the sequence alignment correspond to amino acid residue numbers relative to the chicken RPTP $\sigma$  sequence, where residue 1 is the initial methionine. Black arrows above the sequence alignment indicate the location of the  $\beta$ -strands within the two immunoglobulin domains, based on the structure of chick Ig1-2, assigned using ksdssp (S29). Blue boxes highlight the lysine loop between  $\beta$  strands C-D (containing K67, K68, K70 and K71) and the arginine loop between  $\beta$  strands E-F (containing R96 and R99). Black asterisks above the alignments highlight R76 and D100, the two residues forming the salt bridge which is disrupted upon binding of human LAR Ig1-2 to sucrose octasulphate.

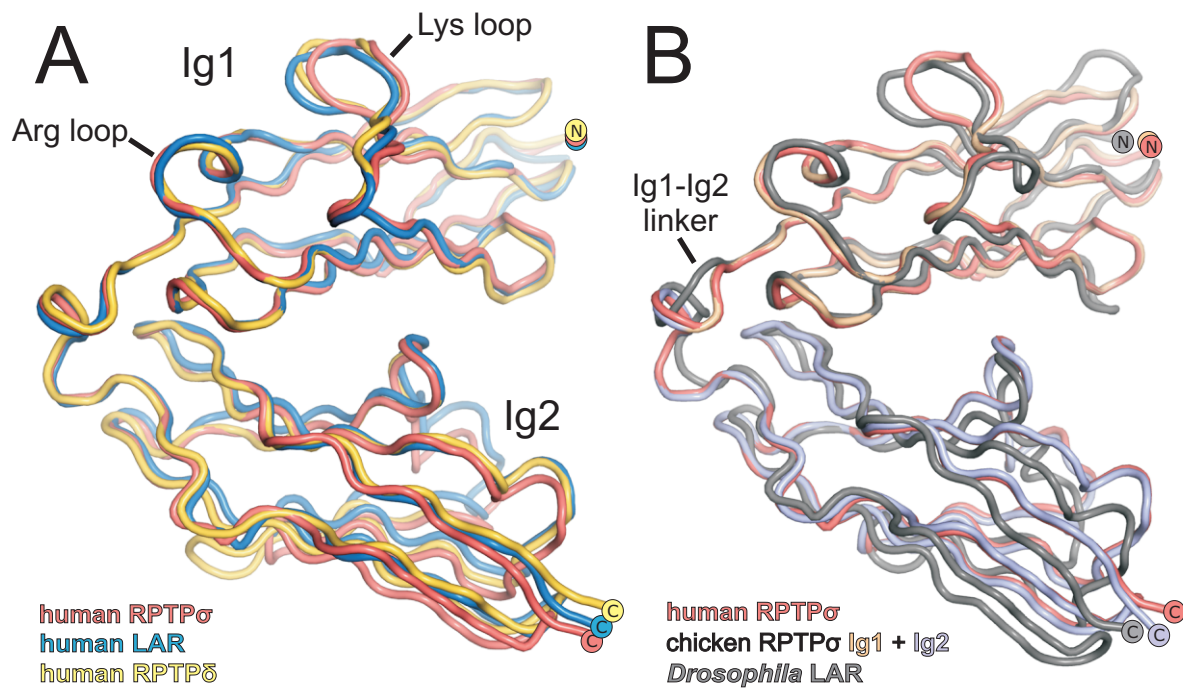

**C**

| Reference Structure           | Moving Structure                           | Residue range used for alignment | Equivalent residues | Sequence identity of equivalences (%) | rmsd of equivalences (Å) |
|-------------------------------|--------------------------------------------|----------------------------------|---------------------|---------------------------------------|--------------------------|
| Human RPTP $\sigma$ I4,22 Ig1 | Chicken RPTP $\sigma$ I4,22 Ig1            | 29 to 125                        | 97                  | 92                                    | 0.27                     |
| Human RPTP $\sigma$ I4,22 Ig1 | Human RPTP $\sigma$ C2 Ig1                 | 30 to 126                        | 96                  | 100                                   | 0.45                     |
| Human RPTP $\sigma$ I4,22 Ig1 | Human LAR P3 <sub>2</sub> 21 Ig1           | 30 to 126                        | 97                  | 71                                    | 0.76                     |
| Human RPTP $\sigma$ I4,22 Ig1 | Human RPTP $\delta$ P3 <sub>2</sub> 21 Ig1 | 21 to 117                        | 97                  | 73                                    | 0.70                     |
| Human RPTP $\sigma$ I4,22 Ig1 | Human RPTP $\delta$ C2 A Ig1               | 21 to 117                        | 95                  | 75                                    | 1.00                     |
| Human RPTP $\sigma$ I4,22 Ig1 | Human RPTP $\delta$ C2 B Ig1               | 21 to 117                        | 97                  | 73                                    | 0.84                     |
| Human RPTP $\sigma$ I4,22 Ig1 | <i>Drosophila</i> LAR C2 Ig1               | 35 to 228                        | 91                  | 44                                    | 0.99                     |
| Human RPTP $\sigma$ I4,22 Ig2 | Chicken RPTP $\sigma$ I4,22 Ig2            | 132 to 225                       | 94                  | 96                                    | 0.19                     |
| Human RPTP $\sigma$ I4,22 Ig2 | Human RPTP $\sigma$ C2 Ig2                 | 133 to 226                       | 94                  | 100                                   | 0.76                     |
| Human RPTP $\sigma$ I4,22 Ig2 | Human LAR P3 <sub>2</sub> 21 Ig2           | 133 to 226                       | 94                  | 89                                    | 0.50                     |
| Human RPTP $\sigma$ I4,22 Ig2 | Human RPTP $\delta$ P3 <sub>2</sub> 21 Ig2 | 124 to 117                       | 88                  | 82                                    | 1.41                     |
| Human RPTP $\sigma$ I4,22 Ig2 | Human RPTP $\delta$ C2 A Ig2               | 124 to 117                       | 89                  | 83                                    | 1.25                     |
| Human RPTP $\sigma$ I4,22 Ig2 | Human RPTP $\delta$ C2 B Ig2               | 124 to 117                       | 87                  | 82                                    | 1.45                     |
| Human RPTP $\sigma$ I4,22 Ig2 | <i>Drosophila</i> LAR C2 Ig2               | 138 to 228                       | 92                  | 46                                    | 1.26                     |

| Structure                              | Interdomain interface (Å <sup>2</sup> ) | $\Delta G$ (kcal/mol) | Ig1-Ig2 angle deviation (°) | Surface complementarity statistic |
|----------------------------------------|-----------------------------------------|-----------------------|-----------------------------|-----------------------------------|
| Human RPTP $\sigma$ I4,22              | 640                                     | -6.9                  | 0.0                         | 0.681                             |
| Chicken RPTP $\sigma$ I4,22            | 659                                     | -7.8                  | 2.2                         | 0.723                             |
| Human RPTP $\sigma$ C2                 | 662                                     | -7.4                  | -5.0                        | 0.739                             |
| Human LAR P3 <sub>2</sub> 21           | 662                                     | -7.7                  | -7.8                        | 0.718                             |
| Human RPTP $\delta$ P3 <sub>2</sub> 21 | 654                                     | -6.9                  | -5.9                        | 0.693                             |
| Human RPTP $\delta$ C2 A               | 694                                     | -6.0                  | -10.2                       | 0.700                             |
| Human RPTP $\delta$ C2 B               | 644                                     | -6.9                  | -3.7                        | 0.683                             |
| <i>Drosophila</i> LAR C2               | 588                                     | 0.0                   | 11.3                        | 0.590                             |

**Figure S3.** Structural alignment of the type IIa RPTPs illustrates the conserved architecture of the two N-terminal domains across the type IIa RPTP family. **(A)** Ig1 domains from human RPTP LAR (P3<sub>2</sub>21) and RPTP $\delta$  (P3<sub>2</sub>21) crystal structures were aligned with the Ig1 domain from human RPTP $\sigma$  (I4<sub>1</sub>22) using SHP (S22), to obtain an overlay of the human RPTP structures. **(B)** Ig1 from the chicken RPTP $\sigma$  (I4<sub>1</sub>22) and DLAR (C2) structures were similarly aligned with the Ig1 from human RPTP $\sigma$  (I4<sub>1</sub>22). **(C)** Structural comparison of the Ig1-Ig2 domain interface for the type IIa RPTPs. Ig1-Ig2 angle deviation represents the angle required to realign the Ig2 domains (containing the residues listed) from the Ig1-2 structures on human RPTP $\sigma$  I4<sub>1</sub>22 Ig2 after having first superposed each Ig1-2 structure to align with human RPTP $\sigma$  I4<sub>1</sub>22 Ig1 and was calculated from the rotation matrix obtained for the Ig2 domain transformation in SHP. Interface surface areas per domain and the change in free energy for the Ig1-Ig2 interaction were estimated for each structure (using residues equivalent to 29-130 and 131-226 as molecule A and molecule B respectively), in the PISA prediction program (EBI, EMBL) and the surface complementarity was calculated using SC (S30). Although the buried surface area at the Ig1-Ig2 domain interface is comparable and the interdomain angle variation is small across the structures, the  $\Delta G$  value and surface complementarity score for this domain arrangement in the DLAR structure are both notably less favourable.



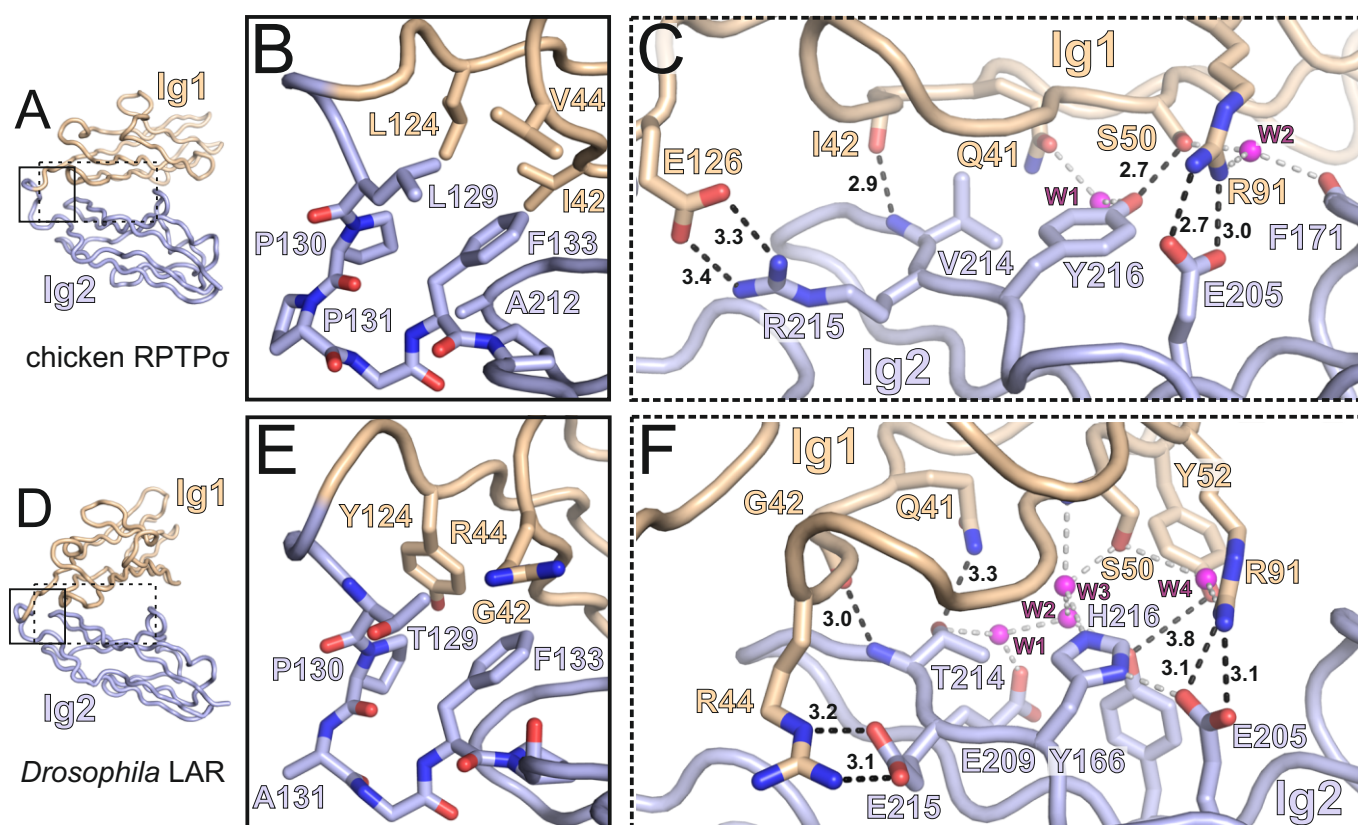

**Figure S4.** Comparison of the Ig1-Ig2 interdomain interactions observed in chicken RPTP $\sigma$  and *Drosophila* LAR (DLAR) Ig1-2 crystal structures. Chicken RPTP $\sigma$ : (A) Ribbon representation of the Ig1-2 crystal structure, highlighting the linker region (solid box) and the domain interface (dashed box). (B) Sidechains of hydrophobic residues L124, L129, P130 and F133, which lie on the Ig1-Ig2 Pro-rich loop, also pack closely with I42, V44 and A212 in a hydrophobic interdomain region, (C) Two salt bridges R91-E205 and E126-R215 and a network of hydrogen bonds involving the hydroxyl groups of S50 and Y216, the sidechain amide of Q41, the backbone carbonyls of I42 and F171, the backbone amide of V214 and two water molecules (purple spheres), hold Ig1 and Ig2 in a rigid arrangement. The interdomain interactions, including the two highlighted water molecules, observed in the chick RPTP $\sigma$  Ig1-2 structure are present in the three human RPTP structures and the residues involved are also highly conserved across species (Fig. S2). DLAR: (D) Ribbon representation of the Ig1-2 crystal structure, highlighting the linker region (solid box) and the domain interface (dashed box), (E) Sidechains of P130 and F133 from the Ig1-Ig2 loop, pack with the carbon backbones of the Y124 and R44 sidechains, but this hydrophobic region is less extensive than in the chicken RPTP $\sigma$  structure. (F) Two salt bridges R91-E205 and R44-E215 and a network of hydrogen bonds involving the backbone carbonyl of G42, the backbone amide of T214, the sidechain amide of Q41, the carboxyl group of E209, the imidazole group of H216, the hydroxyl groups of S50, Y52, Y166 and T214 and four water molecules, hold Ig1 and Ig2 in a similarly rigid arrangement. Interdomain interactions directly between protein residues and through water molecules are illustrated with black and grey dashed lines respectively. Blue and red atoms represent nitrogen and oxygen. Notably, there is a charge swap in residue 215 between the vertebrate (R215) and *Drosophila* (D215) crystal structures, which forms an interdomain salt bridge in all proteins.



**Figure S5.** Sequence alignment of the two N-terminal Ig domains of the type IIa RPTP family members across species (sequences from Fig. S2). Hydrophobic amino acids (AVFMILWY) are coloured green, acidic (DE) are red, basic (RKH) are blue and residues (STCNGQP) are magenta. The bold and dashed lines represent interdomain salt bridges that are either conserved or non-conserved between RPTP Ig1-2 crystal structures. Residues highlighted with black asterisks appear to be involved in interdomain hydrogen bonding interactions and those indicated with black arrows pack in a hydrophobic region near to the rigid interdomain linker.

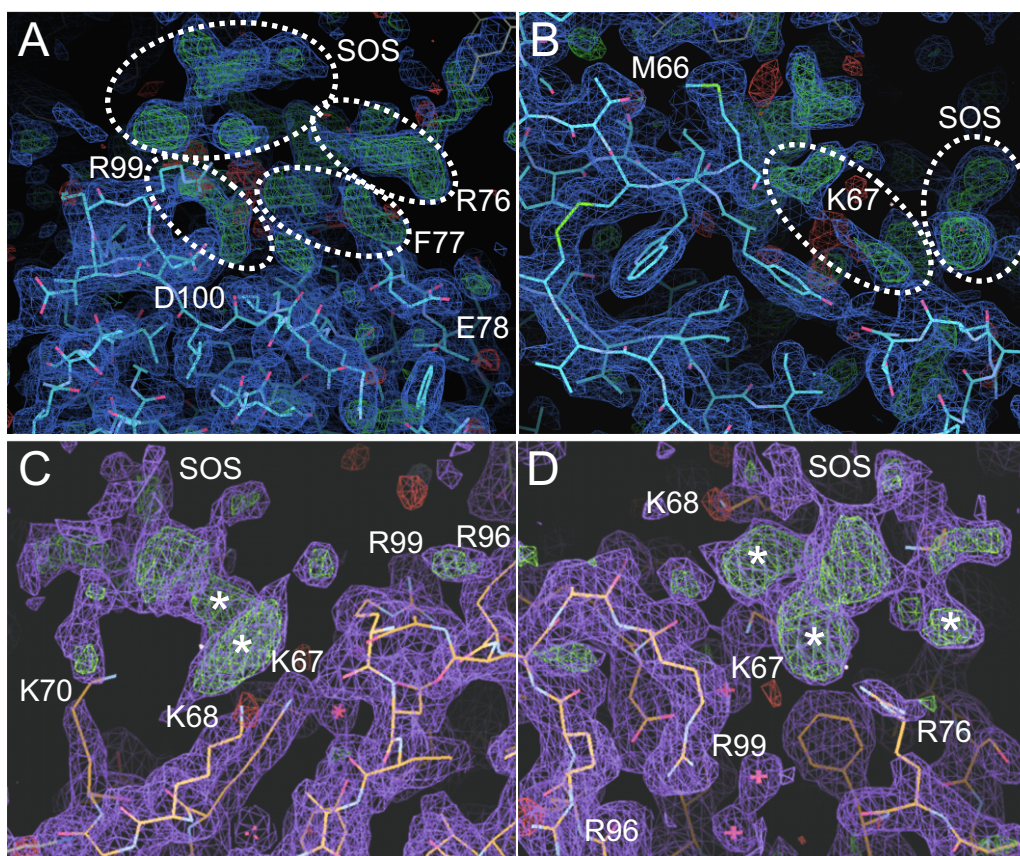

**Figure S6.** Model building for the 2.05 Å human LAR Ig1-2-sucrose octasulphate (SOS) crystal structure. (A) and (B): SigmaA-weighted electron density maps from refinement of the initial human LAR Ig1-2 model after molecular replacement in Phaser (*S16*).  $2F_o - F_c$  maps (blue) and  $F_o - F_c$  maps (green and red) are contoured at  $1 \sigma$  and  $\pm 3 \sigma$  respectively. Unmodelled features in the electron density maps are highlighted by white dashed lines. (C) and (D): SigmaA-weighted electron density maps after refinement in Phenix (*S18*) prior to addition of the SOS ligand to the model.  $2F_o - F_c$  maps (purple) and  $F_o - F_c$  maps (green and red) are contoured at  $1 \sigma$  and  $\pm 3 \sigma$  respectively. Asterisks mark the density into which three sulphate groups of the SOS ligand were initially placed, and onto which a full SOS molecule was superposed. The five-membered ring appeared to fit well into the electron density, but this left the six-membered ring of the ligand pointing into the solvent and consequently without electron density. Therefore the SOS ring was split at the disaccharide linker and just the five-membered ring was included in the model for refinement in Phenix (*S18*). The  $R_{work}$  and  $R_{free}$  decreased from 20.0 % and 23.4 % to 19.5 % and 22.5 % respectively upon addition of the five-membered ring from SOS to the model, supporting the inclusion of the ligand in the final crystal structure. Extensive co-crystallization attempts with fragments of chondroitin sulfate or heparin (widely-used to mimic highly sulfated regions of heparan sulfate) and various type IIa RPTP constructs did not produce interpretable electron density maps for the glycans, presumably due to their structural heterogeneity.



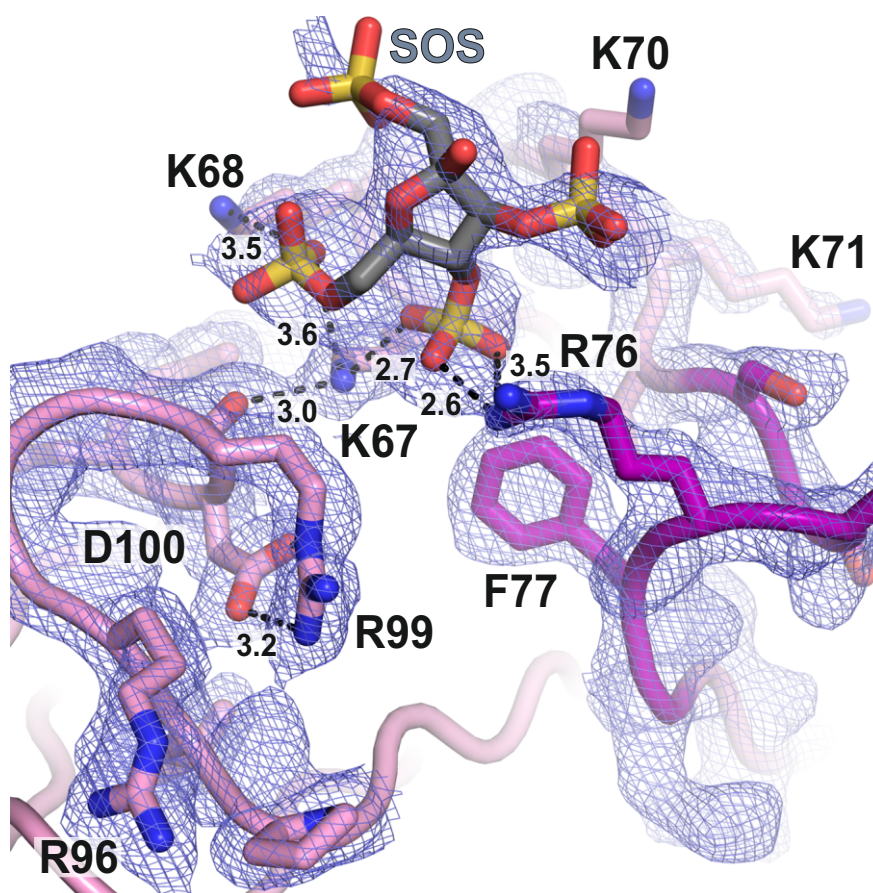

**Figure S7.** Electron density map for the 2.05 Å crystal structure of human LAR Ig1-2 in complex with sucrose octasulphate (SOS). The flexible proteoglycan binding loop is coloured in purple while the remainder of the LAR protein is coloured in pink. The carbon backbone of the SOS ligand is shown in grey. Non-carbon atoms are highlighted as follows: nitrogen, blue; oxygen, red; sulphur, yellow. The sidechains of K67, K68 and R76 are well ordered in the SOS-bound LAR crystal structure and are suitably positioned to form electrostatic interactions with the negatively charged sulphate groups of the SOS ligand (distances less than 3.6 Å between oppositely charged groups are indicated by black dashed lines). R96 and R99 which lie on the Arg-loop are also well ordered, but play no role in SOS-binding in this crystal structure. R99 instead assumes the role of R76 in the apo-LAR crystal structure, by forming a salt bridge with D100 after the R76-D100 salt bridge is broken and R76 becomes involved in ligand binding. K70 is disordered and clear density is not visible for the sidechain. Blue mesh represents the SigmaA-weighted  $2F_o - F_c$  electron density map contoured at  $1 \sigma$ , after the final round of structure refinement in Phenix (*S18*).

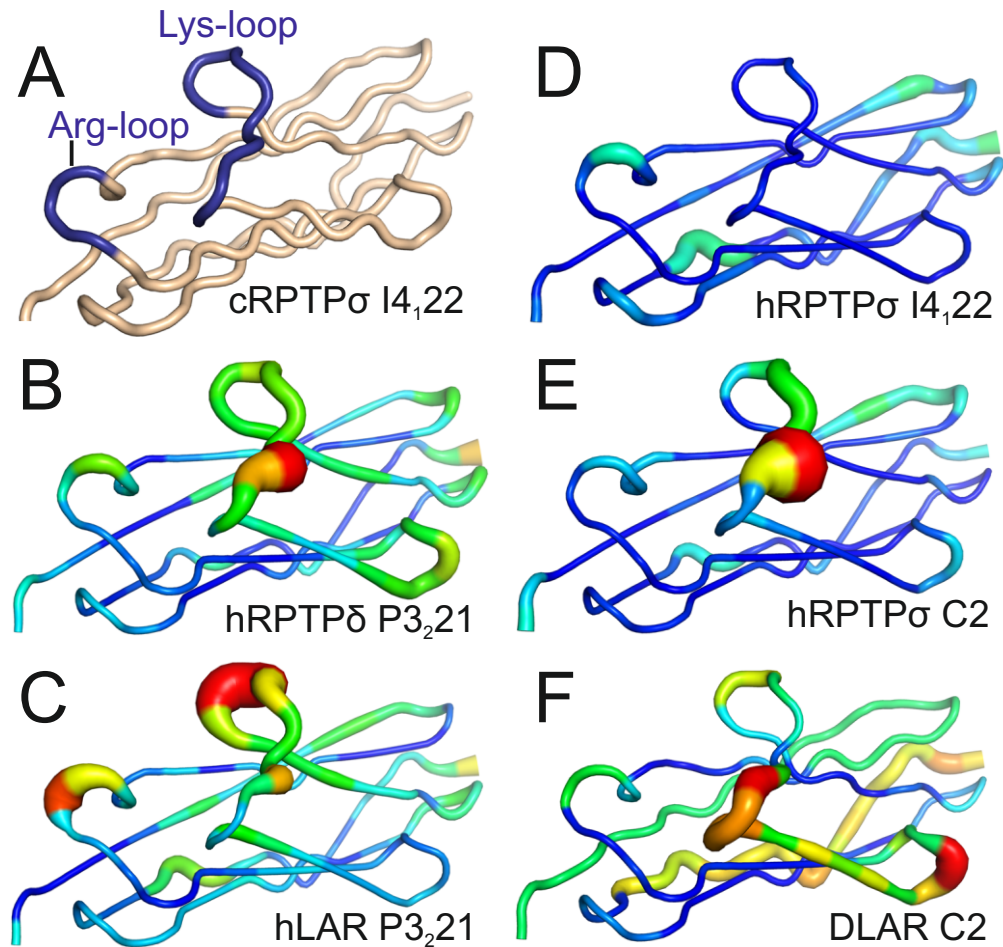

**Figure S8.** Conformational flexibility of the proteoglycan binding loop across type IIa RPTP structures. (A) Ribbon representation of the chicken RPTP $\sigma$  Ig1 backbone. The "Lys"-loop and "Arg"-loop which harbour the crucial heparin binding residues, are highlighted in blue. The rmsd between the Ig1 C $\alpha$  positions of chicken RPTP $\sigma$  (I4 $_1$ 22 space group) and either (B) human RPTP $\delta$  (P3 $_2$ 21 space group), (C) human LAR (P3 $_2$ 21 space group), (D) human RPTP $\sigma$  (I4 $_1$ 22 space group), (E) human RPTP $\sigma$  (C2 space group) or (F) DLAR (C2 space group) was measured using SHP (S22) and is plotted upon the chicken RPTP $\sigma$  Ig1 structure; increasing rmsd values are shown using a rainbow scale (blue, low rmsd; red, high rmsd) and the increasing thickness of the protein backbone. The Lys-loop displays the greatest movement across crystal structures, indicating that this region has an inherent flexibility, which may facilitate binding of the type IIa RPTP receptors to different GAG ligands.

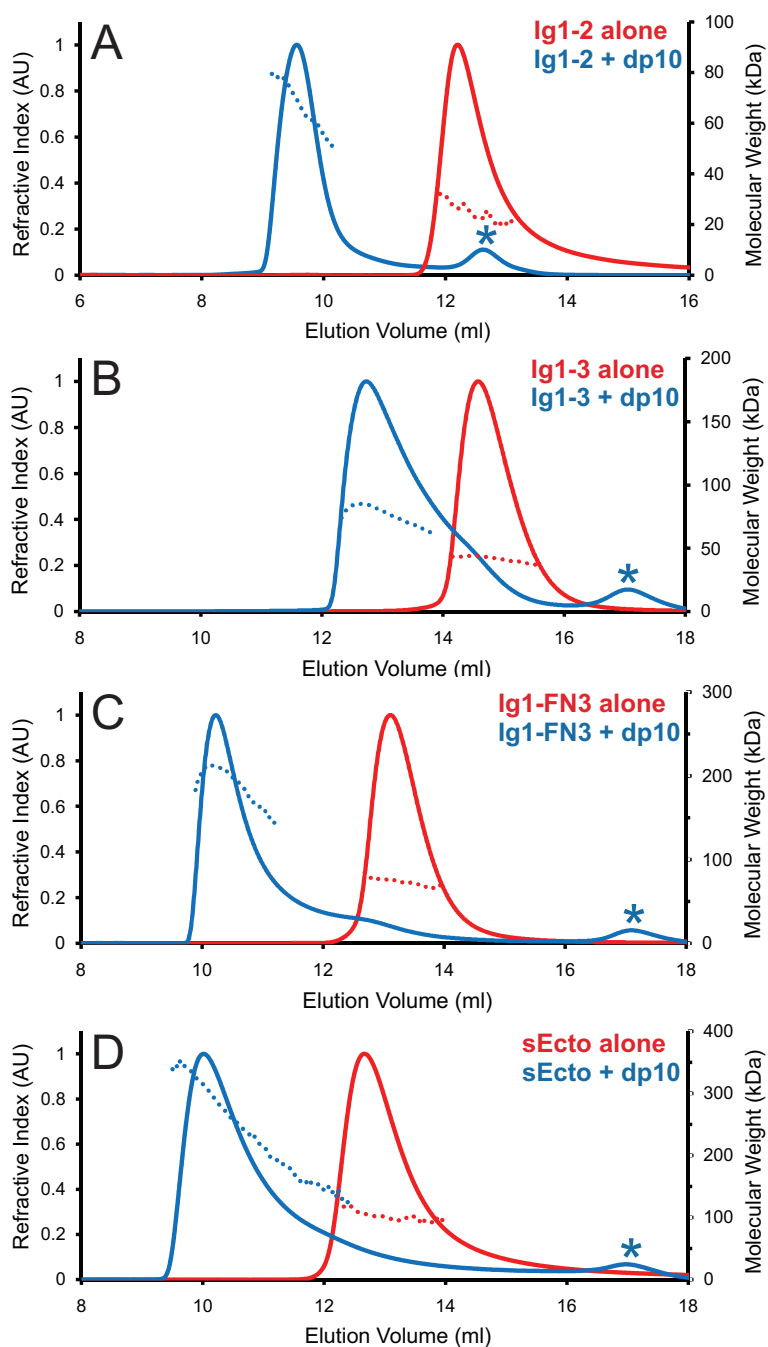

**Figure S9.** Heparin-induced dimerisation of human RPTP $\sigma$  ectodomain constructs. A series of human RPTP $\sigma$  constructs were incubated with (blue) and without (red) a two-fold molar excess of heparin dp10 before SEC-MALS (size-exclusion chromatography-multi-angle light scattering) analysis; (A) Ig1-2, (B) Ig1-3, (C) Ig1-FN3, (D) sEcto. Refractive index traces (scaled within each panel) are shown by bold lines and the measured molecular weights are shown by dotted lines. Peaks in the refractive index that are indicated by an asterisk correspond to excess dp10 ligand. A Superdex 75 column (1 cm x 30 cm) was used for the Ig1-2 construct (A) while all other constructs (B-D) were analysed using a Superdex 200 (1 cm x 30 cm) column.

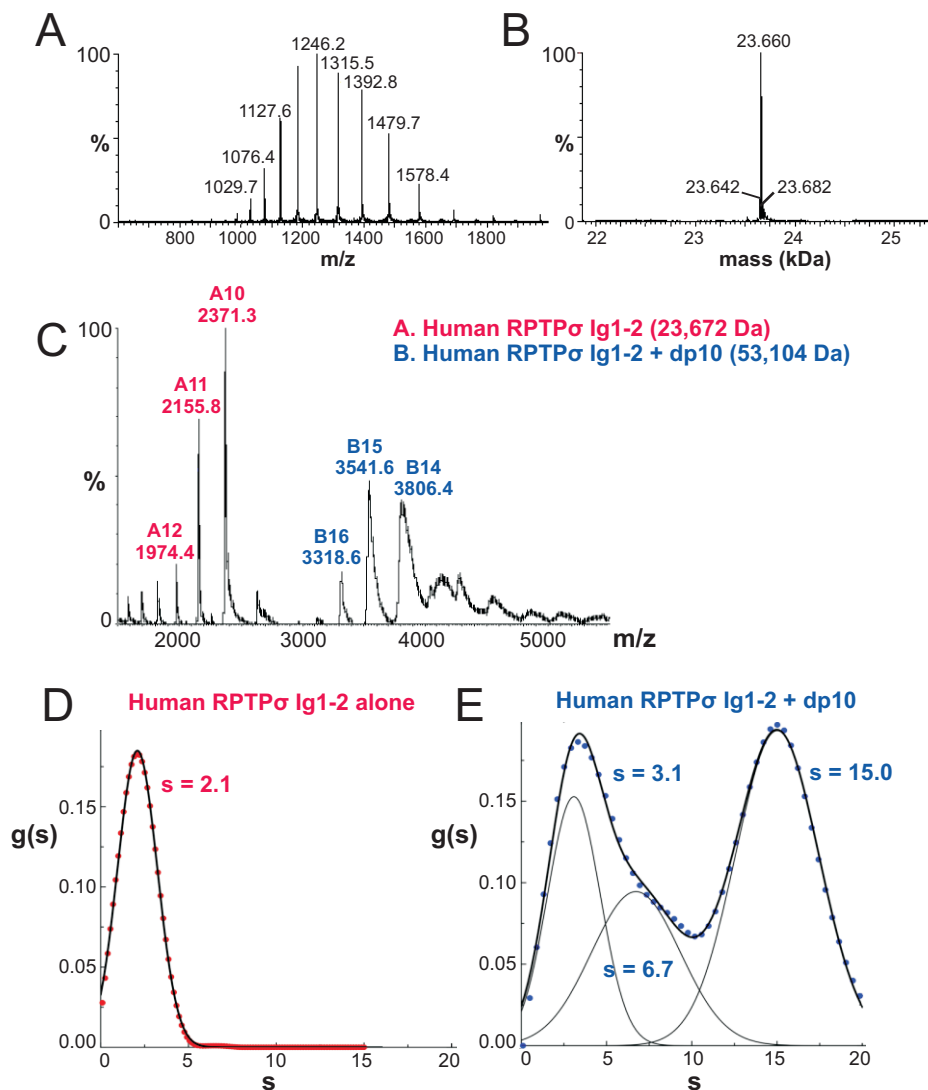

**Figure S10.** Investigation of type IIa RPTP clustering in solution. After incubation of human RPTP $\sigma$  alone or with heparin dp10 (Iduron H010), electrospray ionisation-mass spectrometry (ESI-MS) and analytical ultracentrifugation (AUC) were used to analyse the oligomerisation state of the protein. The mass of human RPTP $\sigma$  Ig1-2 alone was confirmed using ESI-MS under denaturing conditions; (A) an ion series corresponding to different charge states of the proteins was obtained and (B) this ion series was deconvoluted to give the molecular weight of the protein 23,660 Da (estimated molecular weight based on sequence is 23,676 Da). (C) Human RPTP $\sigma$  Ig1-2 in complex with heparin dp10 and analysed using ESI-MS under native conditions. Two main ion series are observed; a series at lower m/z values corresponding to the protein alone (red) with a deconvoluted mass of 23,672 Da and a series at higher m/z values (blue) with a deconvoluted mass of 53,104 Da which would correspond to a protein-dp10 complex. Further ion series at higher m/z values still are also present, which most likely represent higher order oligomers, but these series couldn't be deconvoluted to obtain mass values due to the overlapping arrangement and low abundance of the peaks. A series of sedimentation velocity AUC experiments were performed with the human RPTP $\sigma$  Ig1-2 protein either alone (D) or in complex with heparin dp10 (E). The coloured circles represent the measured data points, while the black lines represent the fit of the data (the normal black lines correspond to the individual species included in the model and the bold lines to the fit of the overall model to the data). A single homogeneous species, with a Svedberg value indicating a monomeric protein was observed in the sample containing the protein alone. However the protein-heparin complex sample appears to contain three different species, which may match the monomeric, dimeric and higher order oligomeric states also observed in the native ESI-MS experiments.



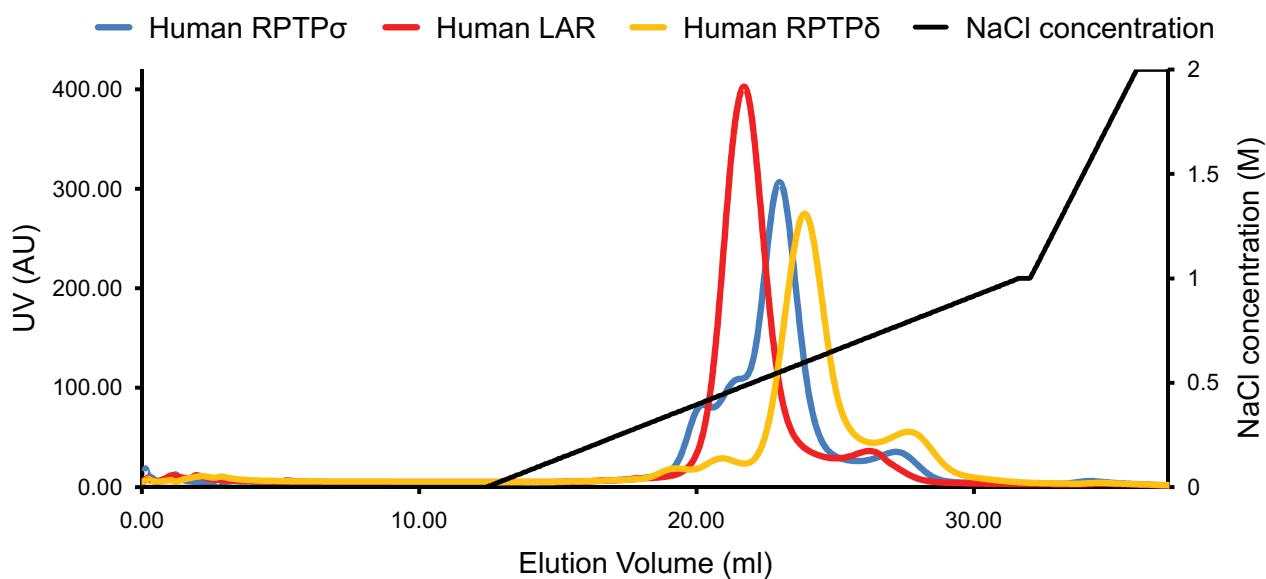

**Figure S11.** The ability of the type IIa RPTPs to bind to a heparin affinity column was measured. Purified Ig1-2 constructs of human RPTP $\sigma$  (blue), RPTP LAR (red) and RPTP $\delta$  (yellow) were sequentially injected over the column and eluted upon addition of 550 mM, 490 mM and 600 mM sodium chloride respectively. All proteins were freshly purified by SEC, then desalted in 50 mM HEPES, 50 mM sodium chloride, pH 7.5 prior to injection onto a 1 ml heparin column, before elution with a gradient of 50 mM HEPES, 2M sodium chloride, pH 7.5 (black).

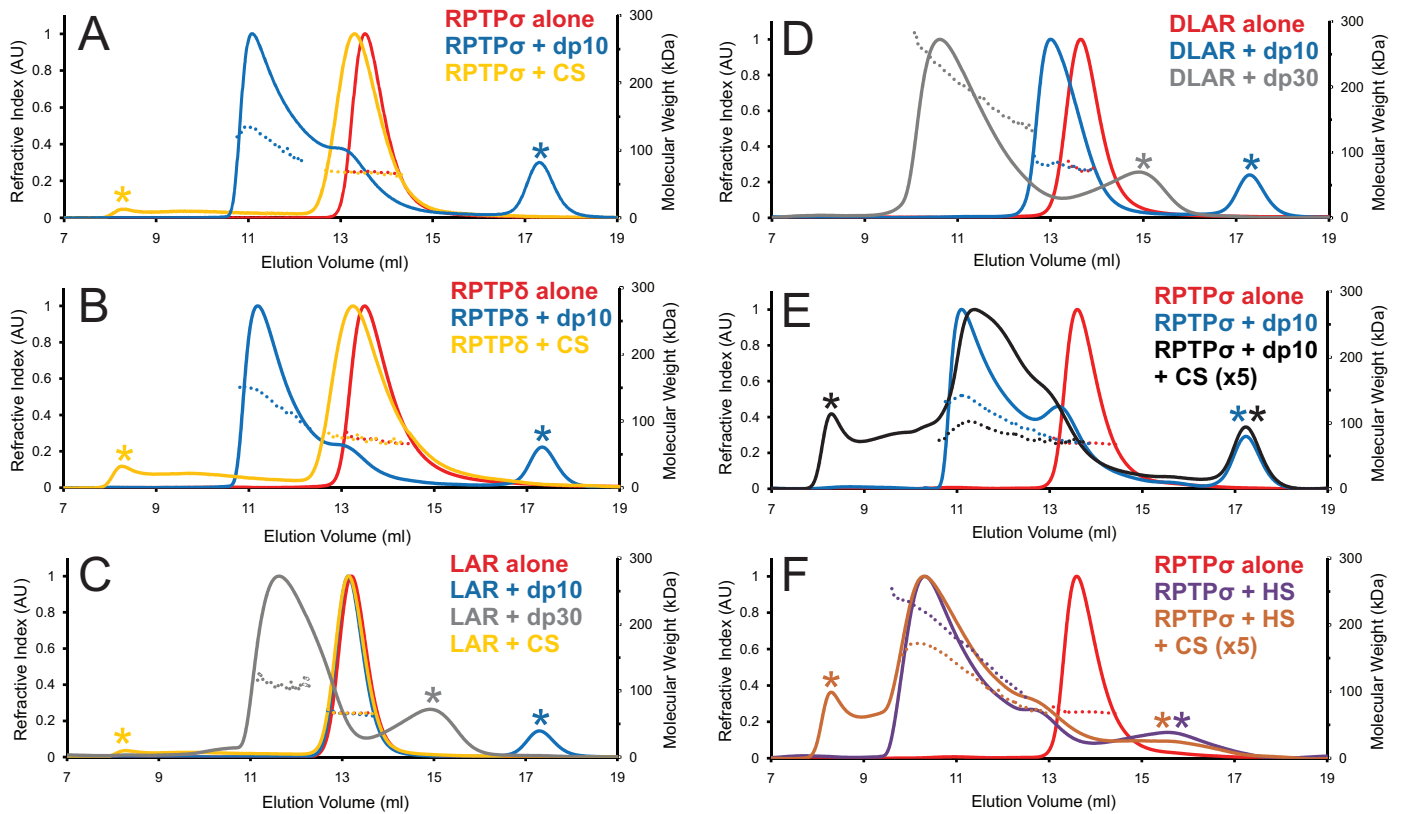

**Figure S12.** GAG-induced oligomerisation of the type IIa RPTP family. Alone (red), or after incubation with a five-fold molar excess of heparin dp10 (blue) or an equivalent amount of chondroitin sulphate (yellow), human RPTP $\sigma$  Ig1-FN3 (**A**), RPTP $\delta$  Ig1-dFN3 (**B**) or LAR Ig1-dFN3 (**C**) were analysed by SEC-MALS. Similarly to RPTP $\sigma$ , RPTP $\delta$  was observed to oligomerise upon addition of heparin dp10, however a longer oligosaccharide (dp30 in a five-fold molar excess, grey) was required to induce oligomerisation of LAR. In contrast to heparin, the introduction of chondroitin sulphate did not induce the oligomerisation of any of the human type IIa family members. Heparin promotes the oligomerisation of DLAR Ig1-FN3 (**D**), but this protein also requires a longer minimal heparin unit than RPTP $\sigma$ . Incubating human RPTP $\sigma$  Ig1-FN3 with a mixture of either heparin dp10 and a five-fold greater amount of chondroitin sulphate (**E**) or heparan sulphate and a five-fold greater amount of chondroitin sulphate (**F**) resulted in oligomers of reduced mass relative to the addition of heparin dp10 or heparan sulphate alone. Refractive index traces (scaled within each panel) are shown by bold lines and the measured molecular weights are shown by dotted lines. Peaks in the refractive index that are indicated by an asterisk correspond to excess oligosaccharide ligand. A Superdex 200 (1 cm x 30 cm) column was used for all constructs.

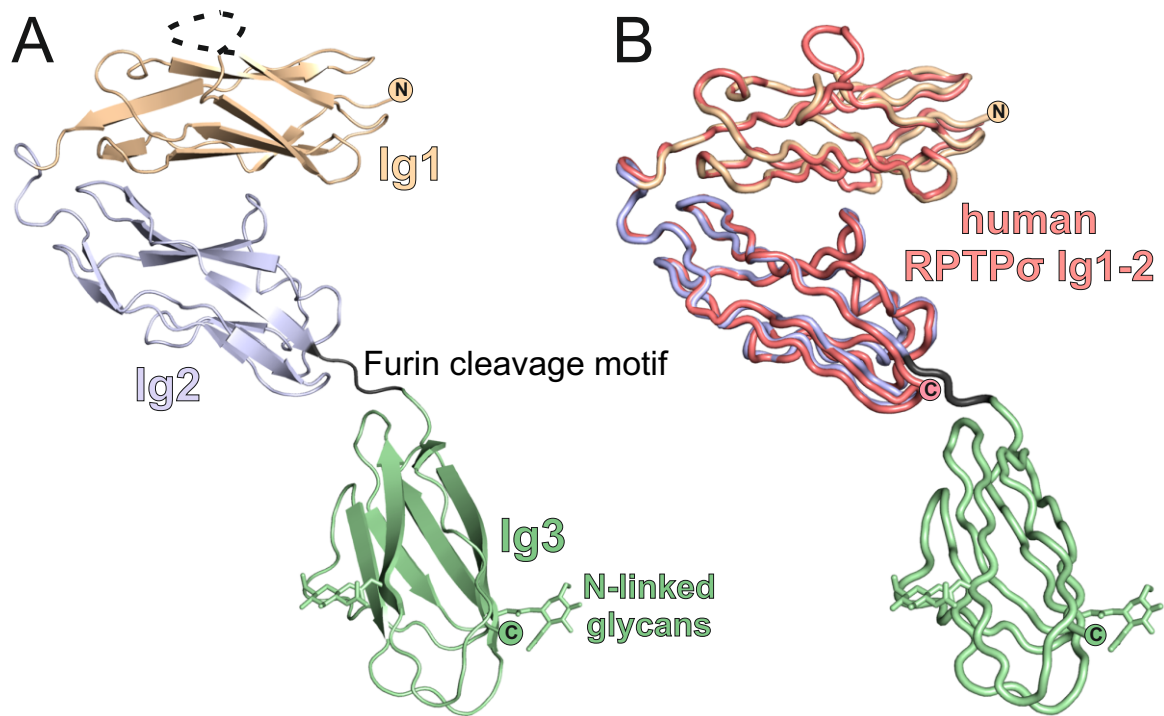

**Figure S13.** Crystal structure of human RPTP $\sigma$  Ig1-3. **(A)** Ribbon representation of the three N-terminal Ig domains of a human RPTP $\sigma$  R227Q+R228N double mutant. Only after introduction of these two point mutations to disrupt a potential furin cleavage motif RVRR, could crystals of intact Ig1-3 protein be obtained. The structure reveals that this motif is located in an exposed, flexible linker (black) between Ig domains 2 and 3. Residues 67-73 of the "Lys"-loop are not included in the structure as they were not well resolved in the electron density; they are indicated here by a dashed black line. **(B)** An overlay of human RPTP $\sigma$  Ig1-2 (pink) and Ig1-3 illustrates the preserved architecture of the first two Ig domains in the Ig1-3 structure.

Removal of Ig1-2, which contains the glycosaminoglycan binding site, either at or prior to arrival at the cell surface, could represent an additional mode of regulation of the type IIa RPTPs. However, RPTP isoforms which contain the MeB exon (which encodes four amino acid residues, ELRE, and lies within the RVRR motif), would be unable to utilise such a regulatory mechanism. For example, an isoform of RPTP $\delta$  lacking MeB is found to be expressed in the kidney, while an isoform with the MeB insert is expressed in the brain (S31, S32), therefore isoform expression patterns would determine whether this proteolytic cleavage event occurs in specific tissues. Additional membrane proximal and non-isoform dependent protease cleavage sites have been identified for type IIa RPTPs (S33), which result in the shedding of almost the entire ectodomain and would also desensitise the receptors to proteoglycans.

A novel RPTP $\sigma$  isoform lacking Ig3 has been identified in human ulcerative colitis patients (S34). The deletion of this domain may result in disruption of RPTP $\sigma$ -ligand interactions, though as yet no binding partner for the Ig3 has been identified. Alternatively, it is possible that the resultant direct fusion of the rigid Ig1-2 unit onto the remainder of the ectodomain, limits the range of movement of the Ig1-2 unit, hampering efficient proteoglycan binding and receptor clustering.

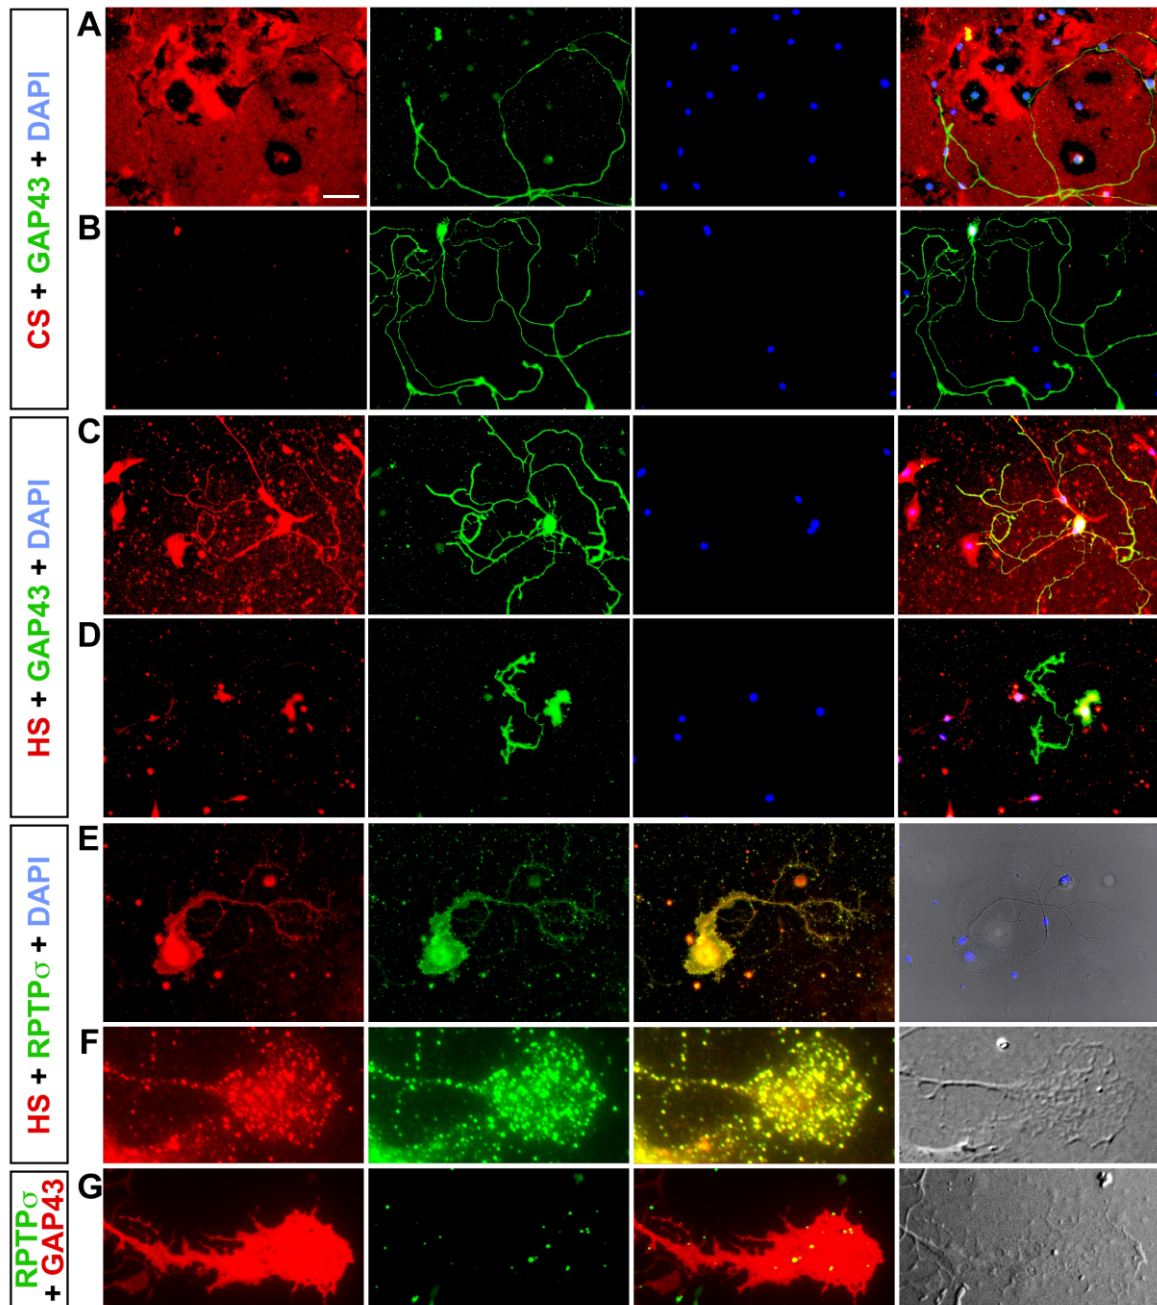

**Figure S14.** Immunolocalization of endogenous HS, CS and RPTP $\sigma$  in DRG neuron cultures. Treatments are as described in Fig. 4 and (27), with additional controls shown here. **(A and B)** Immunolocalization of CS (red), with GAP43 neuronal marker (green) and DAPI nuclear stain (blue). Colors are merged in the right-hand panel. Panel A, shows strong CS labeling over the ECM, whereas areas corresponding to cells showed little or no CS labeling above background. Panel B shows a control treated with chondroitinase ABC to remove CS. **(C and D)** Immunolocalization of HS (red), with GAP43 (green) and DAPI (blue). Colors are merged in the right-hand panel. Panel C, shows strong HS labeling over cells including neurites, with additional faint labeling above background over the ECM. Panel D shows a control treated with combined heparinase I, II and III, to remove HS. **(E-G)** Immunolocalization of RPTP $\sigma$  (green), combined with HS labeling (red) in panels E and F, or GAP43 neuronal marker (red) in panel G. The right-hand panels show DIC images. Panel G shows a negative control for RPTP $\sigma$  labeling with secondary antibody only. RPTP and HS overlapped in similar although not identical patterns in cells, as well as in puncta within the growth cone. Some additional scattered dots were seen outside the cells and may be cell fragments based on DIC and DAPI images. A similar pattern, with punctate labeling in the growth cone and scattered dots outside the cell, was reported for RPTP $\sigma$  previously (35). Scale bar: 60  $\mu$ m (panels A-E), 6  $\mu$ m (panels F and G).

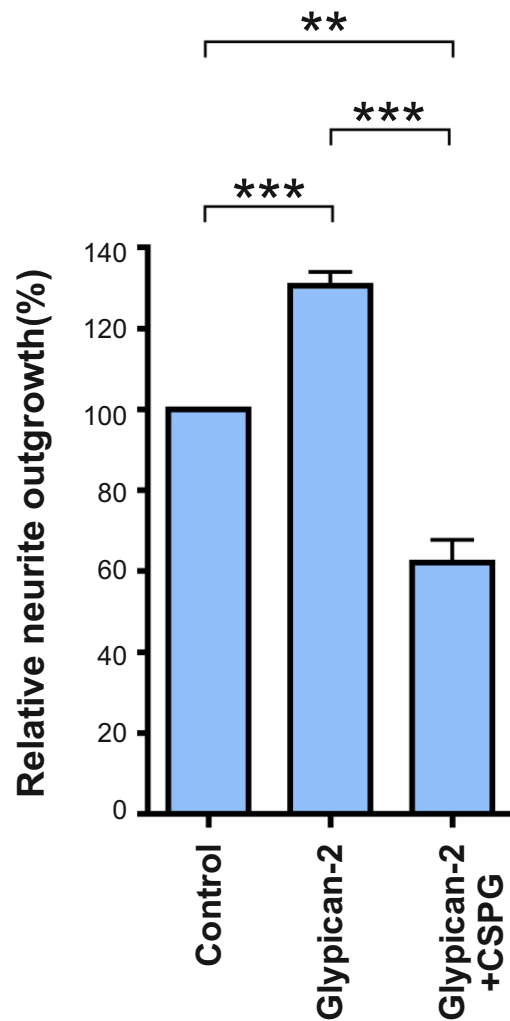

**Figure S15.** CSPG competition for HSPG-induced neurite outgrowth. Wild-type P10 mouse dorsal root ganglion (DRG) neurons were grown on substrates containing a poly-D-lysine/laminin mixture (control), or supplemented with either 5  $\mu\text{g/ml}$  glypican-2, or with a mixture of 5  $\mu\text{g/ml}$  glypican-2 plus 125  $\mu\text{g/ml}$  CSPG. The outgrowth of DRG neurons, relative to control (assigned 100 % outgrowth) was quantified. Treatment with 5  $\mu\text{g/ml}$  glypican-2 promoted outgrowth to a lesser extent than the higher concentration (30  $\mu\text{g/ml}$ ) of glypican-2 used in Figs. 1 and S1. CSPG out-competed the outgrowth promoting effect of glypican-2, leading to outgrowth inhibition relative to the control. Error bars show SEM. \*\*\* $p < 0.001$ , \*\* $p < 0.01$ , Student's t-test.

**Table S1.** Crystallisation conditions and freezing methods

| Construct                                            | Space Group        | Protein Concentration | Crystallisation Condition                                                                                | Temp (°C) | Freezing Procedure                    |
|------------------------------------------------------|--------------------|-----------------------|----------------------------------------------------------------------------------------------------------|-----------|---------------------------------------|
| Chick RPTP $\sigma$ Ig1-2 SeMet                      | I4 <sub>1</sub> 22 | 7 mg/ml               | 10 % w/v PEG 6k<br>0.1 M citrate<br>pH 5                                                                 | 6.5       | 30 % PEG 400                          |
| Chick RPTP $\sigma$ Ig1-2                            | I4 <sub>1</sub> 22 | 7 mg/ml               | 20 % w/v PEG 8k<br>0.1 M CHES<br>pH 9.6                                                                  | 20.5      | 30 % PEG 400                          |
| Human RPTP $\sigma$ Ig1-2 †                          | I4 <sub>1</sub> 22 | 11 mg/ml              | 0.2 M sodium sulphate<br>20 % w/v PEG 3350<br>pH 6.6                                                     | 20.5      | Perfluoropolyether oil<br>PFO-X125/03 |
| Human RPTP $\sigma$ Ig1-2                            | C2                 | 10.5 mg/ml            | 0.2 M NH <sub>4</sub> I<br>20 % w/v PEG 3350<br>pH 6.2                                                   | 20.5      | Perfluoropolyether oil<br>PFO-X125/03 |
| Human RPTP $\delta$ Ig1-2                            | P3 <sub>2</sub> 21 | 6 mg/ml               | 0.085 M tri-sodium citrate dihydrate<br>25% PEG 4k<br>15% glycerol<br>pH5.6                              | 20.5      | Extra 15 % glycerol                   |
| Human RPTP $\delta$ Ig1-2                            | C2                 | 6 mg/ml               | 20 % w/v PEG 3350<br>0.2 M ammonium di-hydrogen phosphate                                                | 20.5      | 30 % ethylene glycol                  |
| Human RPTP LAR Ig1-2                                 | P3 <sub>2</sub> 21 | 9 mg/ml               | 0.1 M sodium acetate trihydrate<br>20 % isopropanol<br>20 % w/v PEG 4k<br>0.25 mM heparin dp10<br>pH 5.6 | 20.5      | 25 % ethylene glycol                  |
| <i>Drosophila</i> RPTP LAR Ig1-2                     | C2                 | 12mg/ml               | 25 % w/v PEG 1500<br>0.1 M SPG System<br>35 mM ammonium sulphate<br>pH 5.0                               | 20.5      | 25 % glycerol                         |
| Human RPTP $\sigma$ Ig1-3<br>R227Q+R228N             | I222               | 6.7 mg/ml             | 20% w/v PEG 3350<br>0.2 M sodium iodide<br>0.1 M bis-Tris propane<br>pH 7.5                              | 20.5      | 30 % glycerol                         |
| Human RPTP LAR Ig1-2 +<br>25 mM sucrose octasulphate | P3 <sub>2</sub> 21 | 9 mg/ml               | 0.1 M MES<br>30 % w/v PEG 6k<br>pH 6.0                                                                   | 20.5      | 30 % propylene glycol                 |

† Crystallisation trials were set up with human RPTP $\sigma$  Ig1-3 wildtype protein. Crystals were obtained within 80 days. Subsequent structure determination showed clear density for Ig1-2, but no space within the crystal lattice for a third Ig domain. This suggested a proteolytic cleavage of the protein within the flexible linker between Ig domains two and three, which contains a putative <sup>225</sup>RVRR<sup>228</sup> furin motif. To obtain crystals of human RPTP $\sigma$  Ig1-3 a double point mutation R227Q+R228N was necessary to disrupt this motif.

**Table S2.** Crystallographic data collection and refinement statistics

| <b>Data collection</b>                                |                                     |                              |                              |                              |                              |                              |                              |                         |                                     |                               |                              |
|-------------------------------------------------------|-------------------------------------|------------------------------|------------------------------|------------------------------|------------------------------|------------------------------|------------------------------|-------------------------|-------------------------------------|-------------------------------|------------------------------|
| Protein                                               | Chick RPTP $\sigma$<br>Igl-2, SeMet | Chick RPTP $\sigma$<br>Igl-2 | Human RPTP $\sigma$<br>Igl-2 | Human RPTP $\sigma$<br>Igl-2 | Human RPTP $\delta$<br>Igl-2 | Human RPTP $\delta$<br>Igl-2 | Human RPTP $\delta$<br>Igl-2 | Human RPTP<br>LAR Igl-2 | <i>Drosophila</i> RPTP<br>LAR Igl-2 | Human RPTP<br>LAR Igl-2 + SOS | Human RPTP $\sigma$<br>Igl-3 |
| PDB accession code                                    | XXXX                                | XXXX                         | XXXX                         | XXXX                         | XXXX                         | XXXX                         | XXXX                         | XXXX                    | XXXX                                | XXXX                          | XXXX                         |
| Beamline                                              | ESRF-BM14                           | ESRF-BM14                    | ESRF-ID14EH3                 | Diamond-102                  | Diamond-102                  | Diamond-102                  | Diamond-103                  | Diamond-104             | ESRF-ID23EH2                        | Diamond-104                   | Diamond-104                  |
| Resolution (Å)                                        | 50.0-3.1 (3.2-3.1)                  | 74-1.65 (1.7-1.65)           | 40-2.3 (2.38-2.3)            | 29-2.55 (2.6-2.55)           | 50-2.0 (2.06-2.0)            | 49-1.35 (1.4-1.35)           | 48-2.2 (2.26-2.2)            | 40-2.05 (2.12-2.05)     | 50-1.8 (1.85-1.8)                   | 40-2.05 (2.12-2.05)           | 50-2.6 (2.7-2.6)             |
| Spacegroup                                            | I4 <sub>1</sub> 22                  | I4 <sub>1</sub> 22           | I4 <sub>1</sub> 22           | C2                           | C2                           | P3 <sub>1</sub> 21           | P3 <sub>1</sub> 21           | P3 <sub>1</sub> 21      | C2                                  | P3 <sub>1</sub> 21            | I222                         |
| Cell dimensions<br><i>a</i> , <i>b</i> , <i>c</i> (Å) | 104.9, 104.9, 92.0                  | 104.8, 104.8, 94.6           | 104.2, 104.2, 94.9           | 124.2, 29.4, 61.4            | 161.2, 31.7, 92.3            | 48.7, 48.7, 145.9            | 77.0, 77.0, 68.7             | 78.8, 78.8, 71.9        | 124.2, 29.1, 49.4                   | 78.8, 78.8, 71.9              | 71.7, 90.0, 143.3            |
| $\alpha$ , $\beta$ , $\gamma$ (°)                     | 90.0, 90.0, 90.0                    | 90.0, 90.0, 90.0             | 90.0, 90.0, 90.0             | 90.0, 92.6, 90.0             | 90.0, 112.0, 90.0            | 90.0, 90.0, 120.0            | 90.0, 90.0, 120.0            | 90.0, 90.0, 120.0       | 90.0, 107.3, 90.0                   | 90.0, 90.0, 120.0             | 90.0, 90.0, 90.0             |
| Wavelength (Å)                                        | 0.9783                              | 0.9763                       | 1.0600                       | 0.9795                       | 0.9795                       | 0.9795                       | 0.9765                       | 0.9763                  | 0.8726                              | 0.9763                        | 0.9786                       |
| Unique reflections                                    | 4922 (475)                          | 31882 (2319)                 | 12003 (1176)                 | 7438 (474)                   | 30633 (2991)                 | 45165 (3237)                 | 12272 (872)                  | 16614 (1638)            | 16271 (1610)                        | 16614 (1638)                  | 14979 (1469)                 |
| Completeness (%)                                      | 100 (100)                           | 100 (100)                    | 100 (99.9)                   | 98.1 (84.8)                  | 99.8 (99.8)                  | 99.9 (99.8)                  | 99.7 (98.2)                  | 100 (100)               | 100 (100)                           | 100 (100)                     | 99.9 (99.9)                  |
| $R_{\text{merge}}$ (%) <sup>b</sup>                   | 14.9 (86.2)                         | 11.8 (88.5)                  | 13.7 (66.5)                  | 8.2 (66.6)                   | 7.4 (60.3)                   | 11.4 (81.6)                  | 9.2 (83.1)                   | 10.2 (94.3)             | 8.1 (53.3)                          | 10.2 (94.3)                   | 13.0 (87.0)                  |
| $I/\sigma I$                                          | 33.6 (5.6)                          | 26.2 (4.2)                   | 13.6 (3.7)                   | 13.7 (2.6)                   | 16.8 (2.1)                   | 17.4 (3.1)                   | 19.1 (3.6)                   | 24.7 (2.7)              | 19.6 (3.1)                          | 24.7 (2.7)                    | 14.6 (2.3)                   |
| Redundancy                                            | 35.7 (36.9)                         | 26.0 (18.6)                  | 18.3 (18.3)                  | 3.5 (3.1)                    | 3.6 (3.6)                    | 15.0 (10.4)                  | 10.7 (10.6)                  | 9.9 (10.0)              | 5.6 (5.4)                           | 9.9 (10.0)                    | 7.2 (7.4)                    |
| Resolution range (Å)                                  | 74-1.65                             | 40-2.3                       | 40-2.3                       | 29-2.55                      | 50-2.0                       | 49-1.35                      | 48-2.2                       | 40-2.05                 | 50-1.8                              | 40-2.05                       | 50-2.6                       |
| Number of reflections                                 | 30925                               | 11897                        | 11897                        | 7196                         | 28407                        | 42829                        | 11593                        | 15755                   | 16006                               | 15755                         | 13846                        |
| $R_{\text{work}}$ (%) <sup>c</sup>                    | 17.0                                | 19.9                         | 20.2                         | 21.8                         | 21.8                         | 13.7                         | 19.3                         | 19.5                    | 18.1                                | 19.5                          | 24.8                         |
| $R_{\text{free}}$ (%) <sup>d</sup>                    | 20.4                                | 23.3                         | 26.0                         | 24.8                         | 24.8                         | 17.0                         | 23.1                         | 22.2                    | 22.2                                | 22.7                          | 28.9                         |
| Number of protein atoms                               | 1677                                | 1546                         | 3079                         | 1524                         | 3079                         | 1657                         | 1518                         | 1506                    | 1505                                | 1506                          | 2119                         |
| Number of chloride ions                               | 1                                   | 1                            | 1                            | 3                            | 1                            | 1                            | 1                            | 1                       | 1                                   | 1                             | 4                            |
| Number of sodium ions                                 | -                                   | 1                            | -                            | -                            | -                            | -                            | -                            | -                       | -                                   | -                             | -                            |
| Number of sulphate ions                               | 1                                   | -                            | -                            | -                            | -                            | -                            | -                            | -                       | -                                   | -                             | -                            |
| Number of phosphate ions                              | -                                   | -                            | -                            | 3                            | -                            | -                            | -                            | -                       | -                                   | -                             | -                            |
| Number of iodide ions                                 | -                                   | -                            | -                            | 4                            | -                            | -                            | -                            | -                       | -                                   | -                             | 4                            |
| Number of PEG molecules                               | 3                                   | -                            | -                            | -                            | -                            | -                            | -                            | -                       | -                                   | -                             | -                            |
| Number of citrate molecules                           | -                                   | -                            | -                            | -                            | -                            | 1                            | -                            | -                       | -                                   | -                             | -                            |
| Number of B3P molecules                               | -                                   | -                            | -                            | -                            | -                            | -                            | -                            | -                       | -                                   | -                             | 1                            |
| Number of SOS atoms                                   | -                                   | -                            | -                            | -                            | -                            | -                            | -                            | 28                      | -                                   | -                             | -                            |
| Number of NAG molecules                               | -                                   | -                            | -                            | -                            | -                            | -                            | -                            | -                       | -                                   | -                             | 2                            |
| Number of glycine molecules                           | -                                   | -                            | -                            | -                            | -                            | -                            | -                            | -                       | 1                                   | -                             | -                            |
| Number of water molecules                             | 273                                 | 81                           | 139                          | 29                           | 139                          | 259                          | 58                           | 97                      | 115                                 | 97                            | 21                           |
| r.m.s.d. bonds(Å)                                     | 0.009                               | 0.007                        | 0.005                        | 0.005                        | 0.009                        | 0.014                        | 0.004                        | 0.014                   | 0.007                               | 0.014                         | 0.006                        |
| r.m.s.d. angles (deg)                                 | 1.296                               | 1.006                        | 0.831                        | 1.43                         | 1.43                         | 1.660                        | 0.848                        | 1.237                   | 1.138                               | 1.237                         | 0.955                        |
| <b>Average B factor (Å<sup>2</sup>):</b>              |                                     |                              |                              |                              |                              |                              |                              |                         |                                     |                               |                              |
| - protein                                             | 20.2                                | 38.3                         | 30.6                         | 43.8                         | 43.8                         | 13.7                         | 40.4                         | 43.9                    | 31.1                                | 43.9                          | 69.0                         |
| - chloride ions                                       | 12.8                                | 31.9                         | 19.2                         | -                            | -                            | 16.4                         | -                            | -                       | -                                   | -                             | 53.3                         |
| - sodium ions                                         | -                                   | 25.4                         | -                            | -                            | -                            | -                            | -                            | -                       | -                                   | -                             | -                            |
| - sulphate ions                                       | 59.4                                | -                            | -                            | -                            | -                            | -                            | -                            | -                       | -                                   | -                             | -                            |
| - phosphate ions                                      | -                                   | -                            | -                            | 68.3                         | -                            | -                            | -                            | -                       | -                                   | -                             | -                            |
| - iodide ions                                         | -                                   | -                            | 61.1                         | -                            | -                            | -                            | -                            | -                       | -                                   | -                             | 45.3                         |
| - PEG molecules                                       | 40.1                                | -                            | -                            | -                            | -                            | -                            | -                            | -                       | -                                   | -                             | -                            |
| - citrate molecules                                   | -                                   | -                            | -                            | -                            | -                            | 24.3                         | -                            | -                       | -                                   | -                             | -                            |
| - B3P molecules                                       | -                                   | -                            | -                            | -                            | -                            | -                            | -                            | -                       | -                                   | -                             | 51.5                         |
| - SOS molecules                                       | -                                   | -                            | -                            | -                            | -                            | -                            | -                            | 147.3                   | -                                   | -                             | -                            |
| - NAG molecules                                       | -                                   | -                            | -                            | -                            | -                            | -                            | -                            | -                       | -                                   | -                             | 76.0                         |
| - Glycine molecules                                   | -                                   | -                            | -                            | -                            | -                            | -                            | -                            | -                       | 62.1                                | -                             | -                            |
| - water molecules                                     | 29.7                                | 37.5                         | 22.3                         | 39.5                         | 39.5                         | 25.3                         | 35.3                         | 44.0                    | 35.6                                | 44.0                          | 42.2                         |
| <b>Ramachandran plot (% residues) :</b>               |                                     |                              |                              |                              |                              |                              |                              |                         |                                     |                               |                              |
| - favoured                                            | 98.5                                | 98.0                         | 94.9                         | 97.1                         | 97.1                         | 99.0                         | 97.5                         | 98.0                    | 98.5                                | 98.0                          | 96.0                         |
| - additionally allowed                                | 1.5                                 | 1.5                          | 5.1                          | 2.9                          | 2.9                          | 1.0                          | 2.5                          | 2.0                     | 1.5                                 | 2.0                           | 4.0                          |
| - disallowed                                          | 0                                   | 0.5                          | 0                            | 0                            | 0                            | 0                            | 0                            | 0                       | 0                                   | 0                             | 0                            |

<sup>a</sup>Numbers in parentheses refer to the appropriate outer shell.

<sup>b</sup> $R_{\text{merge}} = \sum hkl \sum_j |I_j - \langle I_j \rangle| / \sum hkl \sum_j I_j$ , where  $hkl$  specifies unique indices,  $j$  indicates equivalent observations of  $hkl$ , and  $\langle I_j \rangle$  is the mean value.

<sup>c</sup> $R_{\text{work}} = \sum hkl |F_o| - F_c| / \sum hkl |F_o|$ , where  $|F_o|$  and  $|F_c|$  are the observed and calculated structure factor amplitudes, respectively.

<sup>d</sup> $R_{\text{free}}$  is calculated as per  $R_{\text{work}}$  for a 5% subset of reflections which was not used in the crystallographic refinement.



**Table S3.** Summary of MALS experiments. Heparin experiments in blue or white were performed with different batches of heparin oligomers and tested at 1:2 and 1:5 protein:heparin ratios respectively. The approximate molecular weight of heparin dp10 is ~3.3 kDa, dp20 is ~6.6 kDa and dp30 ~10 kDa. CS (Sigma, C4384) and HS (Iduron, GAG-HS01) mixtures used in these experiments contain GAG fragments 10-50 kDa in mass. All Ig1-FN3 proteins were injected at ~10  $\mu$ M. The molecular weight values listed in this table (MALS MW) were measured at the peak in the refractive index trace for a given experiment. The error in the measured molecular weights is the uncertainty statistic provided by the Astra software (Wyatt Technologies).

| Protein and construct name     | GAG added      | Protein concentration at peak | Number of N-glyc sites | Theoretical MW (+ N-glyc) | MALS MW ( $\pm$ error) | Dominant oligomeric state |
|--------------------------------|----------------|-------------------------------|------------------------|---------------------------|------------------------|---------------------------|
|                                |                | $\mu$ g/ml                    |                        | kDa                       |                        |                           |
| <b>RPTP<math>\sigma</math></b> |                |                               |                        |                           |                        |                           |
| sEcto                          | none           | 151                           | 2                      | 91.0 (93.7)               | 107.2 (1.1)            | monomer                   |
| sEcto                          | none           | 709                           | 2                      | 91.0 (93.7)               | 128.5 (1.0)            | monomer                   |
| sEcto                          | heparin-dp10   | 147                           | 2                      | 91.0 (93.7)               | 318 (2.4)              | di/trimer                 |
| Ig1-2                          | none           | 211                           | 0                      | 23.7 (23.7)               | 27.2 (1.4)             | monomer                   |
| Ig1-2                          | heparin-dp10   | 383                           | 0                      | 23.7 (23.7)               | 69.8 (0.9)             | di/trimer                 |
| Ig1-3                          | none           | 589                           | 2                      | 34.9 (37.6)               | 44.2 (0.2)             | monomer                   |
| Ig1-3                          | heparin-dp10   | 434                           | 2                      | 34.9 (37.6)               | 84.7 (0.6)             | dimer                     |
| Ig1-FN3                        | none           | 173                           | 2                      | 64.3 (67.0)               | 75.3 (0.6)             | monomer                   |
| Ig1-FN3                        | heparin-dp10   | 156                           | 2                      | 64.3 (67.0)               | 211.6 (1.9)            | di/trimer                 |
| Ig1-FN3                        | none           | 69                            | 2                      | 64.3 (67.0)               | 68.7 (0.8)             | monomer                   |
| Ig1-FN3                        | heparin-dp4    | 62                            | 2                      | 64.3 (67.0)               | 73.9 (0.9)             | monomer                   |
| Ig1-FN3                        | heparin-dp6    | 55                            | 2                      | 64.3 (67.0)               | 77.4 (0.8)             | monomer                   |
| Ig1-FN3                        | heparin-dp8    | 26                            | 2                      | 64.3 (67.0)               | 113.5 (0.7)            | dimer                     |
| Ig1-FN3                        | heparin-dp10   | 31                            | 2                      | 64.3 (67.0)               | 119.8 (1.7)            | dimer                     |
| Ig1-FN3                        | heparin-dp20   | 38                            | 2                      | 64.3 (67.0)               | 207 (1.3)              | trimer                    |
| Ig1-FN3                        | heparin-dp30   | 41                            | 2                      | 64.3 (67.0)               | 275.7 (2.8)            | tetramer                  |
| Ig1-FN3                        | HS             | 39                            | 2                      | 64.3 (67.0)               | 219.0 (1.3)            | trimer                    |
| Ig1-FN3                        | HS (x5)        | 38                            | 2                      | 64.3 (67.0)               | 242.3 (1.5)            | tri/tetramer              |
| Ig1-FN3                        | CS             | 52                            | 2                      | 64.3 (67.0)               | 67.7 (1.4)             | monomer                   |
| Ig1-FN3                        | CS (x5)        | 29                            | 2                      | 64.3 (67.0)               | 80.8 (1.4)             | monomer                   |
| Ig1-FN3                        | dp10 + CS (x5) | 36                            | 2                      | 64.3 (67.0)               | 101.8 (1.8)            | mono/dimer                |
| Ig1-FN3                        | HS + CS (x5)   | 44                            | 2                      | 64.3 (67.0)               | 171.3 (1.2)            | di/trimer                 |
| Ig1-FN3 $\Delta$ K             | none           | 83                            | 2                      | 64.3 (67.0)               | 66 (0.3)               | monomer                   |
| Ig1-FN3 $\Delta$ K             | heparin-dp10   | 81                            | 2                      | 64.3 (67.0)               | 66.5 (0.7)             | monomer                   |
| Ig1-FN3 $\Delta$ K             | heparin-dp30   | 77                            | 2                      | 64.3 (67.0)               | 70.6 (2.1)             | monomer                   |
| <b>RPTP<math>\delta</math></b> |                |                               |                        |                           |                        |                           |
| Ig1-FN3                        | none           | 52                            | 2                      | 64.1 (66.8)               | 72 (2.3)               | monomer                   |
| Ig1-FN3                        | heparin-dp10   | 48                            | 2                      | 64.1 (66.8)               | 147.4 (1.7)            | dimer                     |
| Ig1-FN3                        | CS             | 27                            | 2                      | 64.1 (66.8)               | 72.6 (3.6)             | monomer                   |
| <b>LAR</b>                     |                |                               |                        |                           |                        |                           |
| Ig1-FN3                        | none           | 86                            | 2                      | 63.8 (66.5)               | 66.2 (0.8)             | monomer                   |
| Ig1-FN3                        | heparin-dp10   | 85                            | 2                      | 63.8 (66.5)               | 66.1 (0.4)             | monomer                   |
| Ig1-FN3                        | heparin-dp30   | 45                            | 2                      | 63.8 (66.5)               | 107.2 (4.2)            | mono/dimer                |
| Ig1-FN3                        | CS             | 85                            | 2                      | 63.8 (66.5)               | 65.9 (0.9)             | monomer                   |
| <b>DLAR</b>                    |                |                               |                        |                           |                        |                           |
| Ig1-FN3                        | none           | 73                            | 3                      | 64.5 (68.5)               | 71.3 (2.9)             | monomer                   |
| Ig1-FN3                        | heparin-dp10   | 61                            | 3                      | 64.5 (68.5)               | 82.3 (1.9)             | monomer                   |
| Ig1-FN3                        | heparin-dp20   | 42                            | 3                      | 64.5 (68.5)               | 171.6 (10.1)           | di/trimer                 |
| Ig1-FN3                        | heparin-dp30   | 48                            | 3                      | 64.5 (68.5)               | 234 (2.7)              | trimer                    |



## Supporting references

- S1. A. R. Aricescu, W. Lu, E. Y. Jones, *Acta Crystallogr. D Biol. Crystallogr.* **62**, 1243 (2006).
- S2. Y. Shen *et al.*, *Science* **326**, 592 (2009).
- S3. A. D. Elbein, J. E. Tropea, M. Mitchell, G. P. Kaushal, *J. Biol. Chem.* **265**, 15599 (1990).
- S4. V. T. Chang *et al.*, *Structure* **15**, 267 (2007).
- S5. P. J. Reeves, N. Callewaert, R. Contreras, H. G. Khorana, *Proc. Natl. Acad. Sci. U.S.A.* **99**, 13419 (2002).
- S6. F. Grueninger-Leitch, A. D'Arcy, B. D'Arcy, C. Chène, *Protein Sci.* **5**, 2617 (1996).
- S7. T. S. Walter *et al.*, *Acta Crystallogr. D Biol. Crystallogr.* **61**, 651 (2005).
- S8. C. J. Mayo *et al.*, *Structure* **13**, 175 (2005).
- S9. Z. Otwinowski, Minor, Wladek, *Methods Enzymol.*, 307 (1997).
- S10. G. Winter, *J. Appl. Crystallogr.* **43**, 186 (2010).
- S11. G. Sheldrick, *Acta Crystallogr. A* **64**, 112 (2008).
- S12. E. B. C. Vonrhein, P. Roversi, G. Bricogne, *Methods Mol. Biol.*, 215 (2007).
- S13. T. Terwilliger, *Acta Crystallogr. D Biol. Crystallogr.* **59**, 45 (2003).
- S14. A. Perrakis, R. Morris, V. S. Lamzin, *Nat. Struct. Mol. Biol.* **6**, 458 (1999).
- S15. P. Emsley, K. Cowtan, *Acta Crystallogr. D Biol. Crystallogr.* **60**, 2126 (2004).
- S16. A. J. McCoy, R. W. Grosse-Kunstleve, L. C. Storoni, R. J. Read, *Acta Crystallogr. D Biol. Crystallogr.* **61**, 458 (2005).
- S17. G. N. Murshudov, A. A. Vagin, E. J. Dodson, *Acta Crystallogr. D Biol. Crystallogr.* **53**, 240 (1997).
- S18. P. D. Adams *et al.*, *Acta Crystallogr. D Biol. Crystallogr.* **66**, 213 (2010).
- S19. G. Bricogne, *Acta Crystallogr. D Biol. Crystallogr.* **49**, 37 (1993).

- S20. R. A. Laskowski, M. W. MacArthur, D. S. Moss, J. M. Thornton, *J. Appl. Crystallogr.* **26**, 283 (1993).
- S21. I. W. Davis *et al.*, *Nucl. Acids Res.* **35**, W375 (2007).
- S22. D. I. Stuart, M. Levine, H. Muirhead, D. K. Stammers, *J. Mol. Biol.* **134**, 109 (1979).
- S23. W. L. DeLano, *DeLano Scientific LLC, Palo Alto, CA, USA.* (2008).
- S24. N. A. Baker, D. Sept, S. Joseph, M. J. Holst, J. A. McCammon, *Proc. Natl. Acad. Sci. U.S.A.* **98**, 10037 (2001).
- S25. W. F. Stafford, E. H. Braswell, *Biophys Chem.* **108**, 273 (2004).
- S26. K. G. Johnson *et al.*, *Neuron* **49**, 517 (2006).
- S27. J. G. Flanagan, H.-J. Cheng, *Methods Enzymol.* **327**, 198 (2000).
- S28. J. G. Flanagan *et al.*, *Methods Enzymol.* **327**, 19 (2000).
- S29. W. Kabsch, C. Sander, *Biopolymers* **22**, 2577 (1983).
- S30. M. C. Lawrence, P. M. Colman, *J. Mol. Biol.* **234**, 946 (1993).
- S31. R. Pulido, N. X. Krueger, C. Serra-Pagès, H. Saito, M. Streuli, *J. Biol. Chem.* **270**, 6722 (1995).
- S32. R. Pulido, C. Serra-Pagès, M. Tang, M. Streuli, *Proc. Natl. Acad. Sci. U.S.A.* **92**, 11686 (1995).
- S33. B. Aicher, M. M. Lerch, T. Muller, J. Schilling, A. Ullrich, *J. Cell Biol.* **138**, 681 (1997).
- S34. A. M. Muisse *et al.*, *Curr. Biol.* **17**, 1212 (2007).
- S35. K. M. Thompson *et al.*, *Mol. Cell. Neuro.* **23**, 681 (2003).
